# Supplementary material for: Overlapping transcriptional expression response of wheat zinc-induced facilitator-like transporters emphasize important role during Fe and Zn stress
Source: BMC Mol Biol. 2019 Sep 23;20:22. doi: 10.1186/s12867-019-0139-6 (PMC6757437; doi:10.1186/s12867-019-0139-6)
Supplement: Supplementary file 7 — Additional file 7: Table S6. Table listing the details and expression values extracted from expVIP for different developmental stages and tissues, as well as fold change values obtained after processing the TPM values for the stress conditions (Abiotic stress: phosphate deficiency; heat, drought, combined heat-drought stress, & Biotic stress: Fusarium heat blight, Septoria tritici, stripe Rust and Powdery mildew). [file 12867_2019_139_MOESM7_ESM.xlsx]

## Sheet: abiotic
Table S6: Table listing the details and expression values extracted from expVIP for different developmental stages and tissues, as well as fold change values obtained after processing the TPM values for the stress conditions (Abiotic stress: phosphate starvation; heat, drought, combined heat-drought stress, & Biotic stress: Fusarium heat blight, Septoria tritici, stripe Rust and Powdery mildew).
Wheat sequence IDs		Ps root_24d_Ps10d_CS/Ps root_24d_None_CS	Ps shoot_24d_Ps10d_CS/Ps shoot_24d_None_CS	DHST leaf_1h_ds_TA/DHST leaf_none_TA	DHST leaf_6h_ds_TA/DHST leaf_none_TA	DHST leaf_1h_hs_TA/DHST leaf_none_TA	DHST leaf_6h_hs_TA/DHST leaf_none_TA	DHST leaf_1h_d&hcs_TA/DHST leaf_none_TA	DHST leaf_6h_d&hcs_TA/DHST leaf_none_TA
TRIAE_CS42_3AS_TGACv1_211977_AA0696280.1	TaZIFL1.1_3A	0.742674	1.0129	1.01753	0.783442	0.780242	0.887077	0.81413	0.920647
TRIAE_CS42_3B_TGACv1_221443_AA0741090.1	TaZIFL1.1_3B	1.12719	1.06366	0.826948	0.635223	0.519607	0.543278	0.530103	0.747476
TRIAE_CS42_3AS_TGACv1_210659_AA0676650.1	TaZIFL1.2_3A	0.877492	0.611616	0.640437	0.299209	0.354028	0.397862	0.160143	0.367165
TRIAE_CS42_3B_TGACv1_222071_AA0756680.1	TaZIFL1.2_3B	0.954369	0.591094	0.931212	0.461395	0.54402	1.68071	0.486296	1.0456
TRIAE_CS42_3DS_TGACv1_271661_AA0905070.2	TaZIFL1.2_3D	0.965394	0.503169	1.14042	0.636388	0.47455	0.571161	0.291578	0.366472
TRIAE_CS42_3B_TGACv1_222542_AA0766590.1	TaZIFL2.1_3B	1	0.969394	1	1	1	1	1	1
TRIAE_CS42_3B_TGACv1_227117_AA0821480.1	TaZIFL2.2_3B	1	1	0.814738	0.954506	0.814738	0.814738	0.814738	0.951804
TRIAE_CS42_3DS_TGACv1_272545_AA0922140.1	TaZIFL2.2_3D	1.03606	1.03608	1.1317	1.06981	1.01823	1.05202	1.07034	1.0659
TRIAE_CS42_3AS_TGACv1_211108_AA0685120.2	TaZIFL2.2_3A	1	0.925099	1.00637	1.01336	0.934861	0.963856	0.967994	0.904867
TRIAE_CS42_5BL_TGACv1_405444_AA1327450.1	TaZIFL2.3_5B	1	1	0.99211	1.00181	0.99211	0.99211	0.99211	0.99211
TRIAE_CS42_5DL_TGACv1_433767_AA1421620.1	TaZIFL2.4_5D	0.961569	1.01157	1	1	1	1	1	1
TRIAE_CS42_5BL_TGACv1_406247_AA1342950.1	TaZIFL2.5_5B	0.94492	1	1	1	1	1	1	1
TRIAE_CS42_5DL_TGACv1_432950_AA1395820.2	TaZIFL2.5_5D	1	1	1	1	1	1	1	1
TRIAE_CS42_4DS_TGACv1_362345_AA1178970.1	TaZIFL3_4D	0.976443	0.535525	0.899848	0.729837	0.704429	0.672272	0.68532	0.705261
TRIAE_CS42_4BS_TGACv1_328221_AA1084870.2	TaZIFL3_4B	1	0.673963	0.999812	0.757583	0.875508	1.84085	0.727793	1.14632
TRIAE_CS42_4AL_TGACv1_288497_AA0950190.1	TaZIFL3_4A	1	0.843147	1.01358	1.02474	0.865244	0.919172	0.882813	1.02468
TRIAE_CS42_4DL_TGACv1_342906_AA1125130.1	TaZIFL4.1_4D	0.284135	1	0.994279	0.994279	0.994279	0.994279	0.994279	0.994279
TRIAE_CS42_4BL_TGACv1_320441_AA1039150.2	TaZIFL4.1_4B	0.144658	1	1	1	1	1	1	1
TRIAE_CS42_4BS_TGACv1_327875_AA1077360.1	TaZIFL4.2_4B	0.772486	0.97994	1.0231	1.01046	0.928578	1.08268	0.942683	1.05395
TRIAE_CS42_4DS_TGACv1_362084_AA1176610.1	TaZIFL4.2_4D	0.0668516	1	1	1	1	1	1	1
TRIAE_CS42_4AL_TGACv1_291366_AA0994260.1	TaZIFL4.2_4A	0.0993263	0.979721	0.974895	0.973001	0.966223	0.991159	0.965547	1.02332
TRIAE_CS42_5DL_TGACv1_433110_AA1402350.2	TaZIFL5_5D	1.16709	0.962275	0.892669	0.714015	0.704056	0.707921	0.707058	0.706277
TRIAE_CS42_5BL_TGACv1_404850_AA1312820.1	TaZIFL5_5B	0.851769	0.746889	0.937804	0.152687	0.289272	0.132581	0.301837	0.168467
TRIAE_CS42_5AL_TGACv1_375996_AA1230350.1	TaZIFL5_5A	0.685749	0.660212	0.90531	0.519998	0.351165	0.519073	0.27003	0.576059
TRIAE_CS42_5DL_TGACv1_433110_AA1402340.1	TaZIFL6.1_5D	0.781011	0.874626	0.890082	0.852604	0.805757	0.808854	0.79728	0.837095
TRIAE_CS42_5AL_TGACv1_375996_AA1230380.1	TaZIFL6.1_5A	0.849251	1	1	1.00748	1	1	1	1
TRIAE_CS42_4AL_TGACv1_288715_AA0956250.1	TaZIFL6.2_4A	0.682677	1	1	1	1	1	1	1
TRIAE_CS42_4DS_TGACv1_361827_AA1173320.1	TaZIFL6.2_4D	0.320071	1	1	1	1	1	1	1
TRIAE_CS42_4BS_TGACv1_329309_AA1100040.1	TaZIFL6.2_4B	0.600296	1	1	1	1	1	1	1
TRIAE_CS42_4AL_TGACv1_291366_AA0994250.2	TaZIFL7.1_4A	0.671393	1.13502	1.06553	3.19075	3.68745	4.84907	4.59201	2.80999
TRIAE_CS42_4DS_TGACv1_361603_AA1170580.1	TaZIFL7.1_4D	1.02739	1.13752	1.22454	3.12608	4.68521	6.94184	4.94584	4.41733
TRIAE_CS42_4BS_TGACv1_328561_AA1090060.3	TaZIFL7.1_4B	1.11004	1	1.0589	1.04223	1.10818	1	1.1564	1.05438
TRIAE_CS42_4DS_TGACv1_361556_AA1170070.1	TaZIFL7.2_4D	1.29265	1.05609	0.900128	0.667723	0.690851	2.21132	0.634561	0.915299
TRIAE_CS42_4AL_TGACv1_290490_AA0986000.1	TaZIFL7.2_4A	1.28232	1	1.01774	0.972796	0.973401	0.938386	0.991122	1.00548
TRIAE_CS42_4BS_TGACv1_328176_AA1084060.1	TaZIFL7.2_4B	1.20494	1	1.01475	0.939042	0.95206	1.19589	0.953433	1.1781

## Sheet: biotic
Wheat sequence IDs	IDs	FHB sp_30h_fgi/sp_30h_mi CM	FHB sp_50h_fgi/sp_50h_mi CM	FHB sp_30h_fgi/sp_30h_mi CMN1	FHB sp_50h_fgi /sp_50h_mi CMN1	FHB sp_30h_fgi/sp_30h_mi CMN2	FHB sp_50h_fgi/sp_50h_mi CMN2	FHB sp_30h_fgi/sp_30h_mi CMN3	FHB sp_50h_fgi/sp_50h_mi CMN3	FHB sp_30h_fgi/sp_30h_mi CMN4	FHB sp_50h_fgi/sp_50h_mi CMN4	STIS 2ndlf_4d_st/2ndlf_none S	STIS 2ndlf_10d_st/2ndlf_none S	STIS 2ndlf_13d_st/2ndlf_none S	SRPM lf_srp24h/lf_none N9	SRPM lf_srp48h/lf_none N9	SRPM lf_srp72h/lf_none N9	SRPM lf_pmp24h/lf_none N9	SRPM lf_pmp48h/lf_none N9	SRPM lf_pmp72h/lf_none N9
TRIAE_CS42_3AS_TGACv1_211977_AA0696280.1	TaZIFL1.1_3A	1.04925	0.993927	0.941897	1.04338	0.963004	0.877438	1.02631	0.991062	1.06491	0.844409	0.969116	1.08173	1.55187	0.667222	0.925257	0.806731	0.73064	0.894298	1.02026
TRIAE_CS42_3B_TGACv1_221443_AA0741090.1	TaZIFL1.1_3B	1.03501	1.07788	0.915833	1.11156	1.01243	0.875914	1.21397	0.900012	1.08706	0.977406	1.05652	1.09628	0.923962	0.80722	1.18385	0.980595	0.671502	0.943681	1.20758
TRIAE_CS42_3AS_TGACv1_210659_AA0676650.1	TaZIFL1.2_3A	1.08591	0.939087	0.981436	1.0227	1.09	1.03406	0.98932	0.935392	0.904375	0.935454	2.15211	0.618265	0.458634	0.251419	1.92707	1.55157	0.588084	0.652465	0.947533
TRIAE_CS42_3B_TGACv1_222071_AA0756680.1	TaZIFL1.2_3B	1.00327	1	1.00739	1	1.01138	1.00131	0.993369	1.00314	0.994808	0.993893	2.03553	0.838192	0.429148	0.446334	1.26323	1.19982	0.696671	0.582461	0.699317
TRIAE_CS42_3DS_TGACv1_271661_AA0905070.2	TaZIFL1.2_3D	1	1.00899	1	0.955125	1.06211	1	1	0.945654	0.910902	0.906984	1.33942	0.41206	1.04083	0.397971	1.3122	1.18491	1.07275	0.419403	0.464576
TRIAE_CS42_3B_TGACv1_222542_AA0766590.1	TaZIFL2.1_3B	1	1	1	0.995857	0.995185	1	1	1	1	0.99289	1	1	1	1	1	1	1	1	1
TRIAE_CS42_3B_TGACv1_227117_AA0821480.1	TaZIFL2.2_3B	1.09796	0.810352	1.05357	1.3152	1.03554	1.04673	0.954501	0.618454	0.896558	0.831706	0.711639	0.711639	1.30041	1	1.57959	1	1	1	1
TRIAE_CS42_3DS_TGACv1_272545_AA0922140.1	TaZIFL2.2_3D	1.09632	0.918262	0.949197	1.26018	1.04425	0.759412	0.963266	0.764031	1.05698	0.829678	0.995273	0.968083	0.968083	0.972328	1.07885	1.07729	1.03245	1.07492	1.0147
TRIAE_CS42_3AS_TGACv1_211108_AA0685120.2	TaZIFL2.2_3A	1.05148	1.18027	1.09272	0.993298	0.921464	1.14335	0.689728	0.795671	1.4414	0.886288	1.29869	1	2.25434	1	1	1	1	1	1
TRIAE_CS42_5BL_TGACv1_405444_AA1327450.1	TaZIFL2.3_5B	1	1	1	1	1	1.00588	1	1	1.00498	1	1	1	1	0.991763	0.991763	1.0092	0.991763	0.991763	0.991763
TRIAE_CS42_5DL_TGACv1_433767_AA1421620.1	TaZIFL2.4_5D	1	1	1	1	1	1	1	1	1	1	1	1	1	1	1	1	1	1	1
TRIAE_CS42_5BL_TGACv1_406247_AA1342950.1	TaZIFL2.5_5B	1	1	1	1	1	1	1	1	1	1	1	1	1	1	1	1	1	1	1
TRIAE_CS42_5DL_TGACv1_432950_AA1395820.2	TaZIFL2.5_5D	1	1	1.00408	1	1	1	1	1	1	1	1	1	1	1	1	1	1	1	1
TRIAE_CS42_4DS_TGACv1_362345_AA1178970.1	TaZIFL3_4D	1.05697	0.959914	1.03903	0.938063	0.948351	0.799585	0.96348	0.965904	1.10425	0.917192	1.31992	0.653876	0.53992	0.556475	0.934686	0.717843	0.584958	0.547414	0.55253
TRIAE_CS42_4BS_TGACv1_328221_AA1084870.2	TaZIFL3_4B	1.10954	1.57319	0.755727	0.871869	1.2986	0.75684	0.878235	1.10589	0.809668	1.17644	0.528627	0.492158	0.358364	1.01935	1.42466	1.37944	1.42976	1.1105	1.70133
TRIAE_CS42_4AL_TGACv1_288497_AA0950190.1	TaZIFL3_4A	1.09615	1.18209	0.960734	1.10056	1.04381	0.812953	0.943788	0.911481	0.980387	0.834509	1.15186	1.14398	1.0692	0.736572	1.20865	0.933668	0.774871	0.82554	0.820324
TRIAE_CS42_4DL_TGACv1_342906_AA1125130.1	TaZIFL4.1_4D	1	1	1	1	1	1	1	1	0.995435	1	1	1	1	1	1	1	1	1	1
TRIAE_CS42_4BL_TGACv1_320441_AA1039150.2	TaZIFL4.1_4B	1	1	1	1	1	1	1	1	1	1	1	1	1	1	1	1	1	1.00045	1
TRIAE_CS42_4BS_TGACv1_327875_AA1077360.1	TaZIFL4.2_4B	0.975571	1.03751	1.00535	1.01084	1.00821	0.95585	1.02084	0.974296	0.956972	0.983244	1.05159	1.0015	1.05309	0.992106	0.992106	1.00553	1.02127	1.09448	1.00878
TRIAE_CS42_4DS_TGACv1_362084_AA1176610.1	TaZIFL4.2_4D	1.00821	1	1	0.992232	1.00158	1	0.990699	1	1	1.01076	1	1	1	1	1.04109	1	1	1	1
TRIAE_CS42_4AL_TGACv1_291366_AA0994260.1	TaZIFL4.2_4A	0.995279	0.989775	0.982205	1.01694	0.993423	0.994082	0.978405	1.00639	0.99583	1.00403	1.04017	0.989845	0.989845	0.990664	0.990664	1.0237	0.990664	0.9984	1.00948
TRIAE_CS42_5DL_TGACv1_433110_AA1402350.2	TaZIFL5_5D	1.05974	0.986482	0.975502	1.06998	0.98344	1.0117	0.967611	0.994892	0.987703	1.01913	1.05488	0.943949	0.880466	1.09124	0.947626	1.15302	0.880398	0.880159	0.868452
TRIAE_CS42_5BL_TGACv1_404850_AA1312820.1	TaZIFL5_5B	1.01683	1.10189	0.990039	0.978812	1.01392	0.930461	0.971571	0.897428	0.995912	1.06576	1.58834	0.96388	0.785706	0.868133	1.06655	1.32232	0.690497	0.691226	0.852491
TRIAE_CS42_5AL_TGACv1_375996_AA1230350.1	TaZIFL5_5A	1.12871	1.05176	0.917353	0.899485	1.11546	0.927585	0.830939	1.06029	1.0067	1.00789	1.59576	0.565663	0.768581	0.972611	1.25261	1.06022	1.21482	1.05281	0.626032
TRIAE_CS42_5DL_TGACv1_433110_AA1402340.1	TaZIFL6.1_5D	0.968494	1.00362	1.02629	1.01873	0.990572	1.00938	0.984188	1.00318	0.967566	1.00222	1.08837	1.15175	0.980915	0.930506	0.930506	0.962747	0.98412	0.988987	0.991307
TRIAE_CS42_5AL_TGACv1_375996_AA1230380.1	TaZIFL6.1_5A	1.01708	0.984996	0.996705	1.0136	1.00754	1.0028	1.03508	1.00687	1.00305	0.988339	1	1	1	0.993422	0.993422	0.993422	0.993422	0.993422	0.993422
TRIAE_CS42_4AL_TGACv1_288715_AA0956250.1	TaZIFL6.2_4A	1	1	1	1	1	1	1	1	1	1	1	1	1	1	1	1	1	1	1
TRIAE_CS42_4DS_TGACv1_361827_AA1173320.1	TaZIFL6.2_4D	1	1	1	1	1	1	1	1	1	1	1	1	1	1	1	1	1	1	1
TRIAE_CS42_4BS_TGACv1_329309_AA1100040.1	TaZIFL6.2_4B	1	1	1	1	1	1	1	1	1	1	1	1	1	1	1	1	1	1	1
TRIAE_CS42_4AL_TGACv1_291366_AA0994250.2	TaZIFL7.1_4A	0.879205	1.40554	1.0159	0.657023	0.984593	1.19723	1.25561	1.30409	1.16031	1.50788	0.973723	0.98387	0.921825	1.20951	1.00383	1.16252	1.15993	0.932549	0.61441
TRIAE_CS42_4DS_TGACv1_361603_AA1170580.1	TaZIFL7.1_4D	0.866138	1.3328	1.12891	0.692375	1.03555	1.2423	1.08943	1.51861	1.19453	1.44034	0.712064	0.686686	1.54421	0.98376	0.601229	1.09083	0.958223	0.782522	0.587067
TRIAE_CS42_4BS_TGACv1_328561_AA1090060.3	TaZIFL7.1_4B	0.946637	0.972486	0.894584	1.09547	1.03748	0.921641	0.916239	1.09699	1.01324	0.987255	0.971011	0.971012	0.971011	0.969663	0.969663	0.969663	0.969663	0.969663	0.969663
TRIAE_CS42_4DS_TGACv1_361556_AA1170070.1	TaZIFL7.2_4D	1.03726	1.02766	1.02132	0.974869	1.00998	0.99208	0.995056	0.99271	0.986582	1.01798	1.10612	0.970684	0.881156	1.01439	1.12859	1.23814	1.11307	1.01426	1.10957
TRIAE_CS42_4AL_TGACv1_290490_AA0986000.1	TaZIFL7.2_4A	1.16846	1.0683	0.921562	1	0.975071	1	0.972037	1.03535	1	0.946804	1	1	1	1	1	1	1	1	1
TRIAE_CS42_4BS_TGACv1_328176_AA1084060.1	TaZIFL7.2_4B	1.04503	0.968135	0.968332	0.995695	1	1.00982	1.00101	1.00801	1.01373	0.981564	0.988795	0.987595	0.987289	1.00754	1.06564	0.973063	1.0376	1.22349	0.983259

## Sheet: diffTissues
		whole endosperm 10dpa	whole endosperm 20dpa	transfer cells 20dpa	aleurone layer 20dpa	starchy endosperm 20dpa	starchy endosperm 30dpa	aleurone layer & starchy endosperm 30dpa		aleurone layer 12dpa	seed coat 12dpa	starchy endosperm 12dpa		grain2dpa	grain14dpa	grain30dpa	leaf_seedlingstage	leaf_tilleringstage	leaf2dpa	root_seedlingstage	root_threeleafstage	root_flagleafstage	spike_2nodes	spike_flagleafstage	spike_anthesis	shoot_1cmspike	shoot_2nodes	shoot_anthesis
Wheat sequence IDs	IDs	GTDT we_repr_10dpa CS	GTDT we_repr_20dpa CS	GTDT tc_repr_20dpa CS	GTDT al_repr_20dpa CS	GTDT se_repr_20dpa CS	GTDT se_repr_30dpa CS	GTDT al/se_repr_30dpa CS		GTE al_12dpa_repr Hf	GTE sc_12dpa_repr Hf	GTE se_12dpa_repr Hf	.	DTCS gr_repr_2dpa CS	DTCS gr_repr_14dpa CS	DTCS gr_repr_30dpa CS	DTCS lf_sd_ss CS	DTCS lf_vege_ts CS	DTCS lf_ rep_ 2dpa CS	DTCS rt_ seed_ ss CS	DTCS rt_ vege_ 3ls CS	DTCS rt_ rep_ fls CS	DTCS sp_ vege_ 2nd CS	DTCS sp_ rep_ fls CS	DTCS sp_ rep_ ant CS	DTCS st_ vege_ 1cs CS	DTCS st_ vege_ 2nd CS	DTCS st_ rep_ ant CS
		grain, whole endosperm, reproductive, 10 dpa, no stress, none, Chinese Spring, Chinese Spring(n=4)	grain, whole endosperm, reproductive, 20 dpa, no stress, none, Chinese Spring, Chinese Spring(n=4)	grain, transfer cells, reproductive, 20 dpa, no stress, none, Chinese Spring, Chinese Spring(n=4)	grain, aleurone layer, reproductive, 20 dpa, no stress, none, Chinese Spring, Chinese Spring(n=6)	grain, starchy endosperm, reproductive, 20 dpa, no stress, none, Chinese Spring, Chinese Spring(n=4)	grain, starchy endosperm, reproductive, 30 dpa, no stress, none, Chinese Spring, Chinese Spring(n=4)	grain, aleurone layer and starchy endosperm, reproductive, 30 dpa, no stress, none, Chinese Spring, Chinese Spring(n=4)		grain, aleurone layer, reproductive, 12 dpa, no stress, none, other, Holdfast(n=3)	grain, seed coat, reproductive, 12 dpa, no stress, none, other, Holdfast(n=3)	grain, starchy endosperm, reproductive, 12 dpa, no stress, none, other, Holdfast(n=3)		grain, grain, reproductive, 2 dpa, no stress, none, Chinese Spring, Chinese Spring(n=2)	grain, grain, reproductive, 14 dpa, no stress, none, Chinese Spring, Chinese Spring(n=2)	grain, grain, reproductive, 30 dpa, no stress, none, Chinese Spring, Chinese Spring(n=2)	leaves/shoots, leaves, seedling, seedling stage, no stress, none, Chinese Spring, Chinese Spring(n=2)	leaves/shoots, leaves, vegetative, tillering stage, no stress, none, Chinese Spring, Chinese Spring(n=2)	leaves/shoots, leaves, reproductive, 2 dpa, no stress, none, Chinese Spring, Chinese Spring(n=2)	roots, roots, seedling, seedling stage, no stress, none, Chinese Spring, Chinese Spring(n=2)	roots, roots, vegetative, three leaf stage, no stress, none, Chinese Spring, Chinese Spring(n=2)	roots, roots, reproductive, flag leaf stage, no stress, none, Chinese Spring, Chinese Spring(n=2)	spike, spike, vegetative, two nodes detectable, no stress, none, Chinese Spring, Chinese Spring(n=2)	spike, spike, reproductive, flag leaf stage, no stress, none, Chinese Spring, Chinese Spring(n=2)	spike, spike, reproductive, anthesis, no stress, none, Chinese Spring, Chinese Spring(n=2)	leaves/shoots, stem, vegetative, 1 cm spike, no stress, none, Chinese Spring, Chinese Spring(n=2)	leaves/shoots, stem, vegetative, two nodes detectable, no stress, none, Chinese Spring, Chinese Spring(n=2)	leaves/shoots, stem, reproductive, anthesis, no stress, none, Chinese Spring, Chinese Spring(n=2)
TRIAE_CS42_3AS_TGACv1_211977_AA0696280.1	TaZIFL1.1_3A	0.0130827	0.276397	0.170015	0.390309	0.0325901	0.134005	0.44986		0.101101	0.35949	0		0.0823683	0.0411764	0.593378	0.073543	0.712495	0.9769	0.892818	1.05155	0.893987	0.208157	0.241348	0.178422	0.499217	0.515899	0.434693
TRIAE_CS42_3B_TGACv1_221443_AA0741090.1	TaZIFL1.1_3B	0.0347228	0.092869	0.0754019	0.225503	0.0200759	0.0606044	0.145658		0.2678	1.19149	0.0402017		0.267136	0.263016	1.70362	1.23095	2.78783	3.85908	2.13807	2.68276	2.63912	0.776231	1.03605	1.00443	1.97945	2.78666	3.17365
TRIAE_CS42_3AS_TGACv1_210659_AA0676650.1	TaZIFL1.2_3A	0	0.00637315	0.00957308	0.0037795	0	0.0288501	0.0498852		0	0	0		1.22029	0.0060541	2.54809	41.4924	34.4487	1.29914	2.16235	2.97426	2.97021	0.806507	2.04698	1.05468	8.13293	0.371891	0.0763972
TRIAE_CS42_3B_TGACv1_222071_AA0756680.1	TaZIFL1.2_3B	0.0215432	2.07067	0.253743	2.84769	0.0825258	1.05017	6.47948		0	0	0.0905413		0.896464	0.402128	13.982	47.6559	81.7505	0.972844	2.58908	4.1948	4.37465	1.55431	1.47185	0.319908	13.5453	1.61723	0
TRIAE_CS42_3DS_TGACv1_271661_AA0905070.2	TaZIFL1.2_3D	0	0.779974	0	2.51526	0.032907	0.364939	2.05566		0	0	0		1.13588	0.064791	1.88626	18.5128	29.6557	0.411151	1.46258	3.09193	4.81783	0.513414	2.18565	1.31408	2.95784	0	0
TRIAE_CS42_3B_TGACv1_222542_AA0766590.1	TaZIFL2.1_3B	0	0	0	0	0.0078623	0	0		0	0	0		0.0119428	0	0	0	0	0	0	0	0	0	0.0327064	0.0397742	0	0	0
TRIAE_CS42_3B_TGACv1_227117_AA0821480.1	TaZIFL2.2_3B	0	0	0	0	0	0	0		0	0	0		0.292803	0	0	0	0.0977576	0	0.18779	0.097591	0.154367	0.82949	1.92172	2.93667	0	0	1.49727
TRIAE_CS42_3DS_TGACv1_272545_AA0922140.1	TaZIFL2.2_3D	0.14571	0.0276498	0.0895229	0.155571	0	0.0213701	0.0793585		0.493557	2.31193	0.149449		1.67935	0.235442	0.662894	0.0524482	0.661523	1.97099	0.0397663	0.0220864	0.0918183	10.6128	4.6495	29.9077	1.18493	0.355901	2.35659
TRIAE_CS42_3AS_TGACv1_211108_AA0685120.2	TaZIFL2.2_3A	0	0	0	0	0	0	0		0.0457033	0	0		0	0	0	0	0	0.48355	0	0	0	0.477425	0.296185	0.547755	0.0918153	0	0
TRIAE_CS42_5BL_TGACv1_405444_AA1327450.1	TaZIFL2.3_5B	0	0	0.0419956	0.00407973	0	0	0		0	0	0		0	0.158299	0.125981	0	0.0100623	0	0.219042	0.168914	0.175869	0.0102013	0.0202685	0	0.186404	0.177067	0
TRIAE_CS42_5DL_TGACv1_433767_AA1421620.1	TaZIFL2.4_5D	0	0	0.0180708	0	0	0	0		0	0	0		0	0.0411661	0.108119	0.00889065	0.184685	0	3.38259	2.51769	2.88429	0.0666896	0.0493007	0	0.527153	0.239881	0
TRIAE_CS42_5BL_TGACv1_406247_AA1342950.1	TaZIFL2.5_5B	0	0	0.0280682	0	0	0	0		0	0	0		0	0.019813	0.133018	0.0319098	0	0	2.14551	1.14767	1.63655	0.0209475	0.0860259	0	0.512107	0.427382	0
TRIAE_CS42_5DL_TGACv1_432950_AA1395820.2	TaZIFL2.5_5D	0	0	0	0	0	0	0		0	0	0		0	0	0	0.0150195	0.0184416	0	0	0	0	0.889377	0.188431	0	0.178635	0	0
TRIAE_CS42_4DS_TGACv1_362345_AA1178970.1	TaZIFL3_4D	0	0.00546515	0.018012	0	0.00725033	0.00777035	0.0058178		0	0	0		0.0319936	0.0117598	0.00992245	0.0993418	5.11472	8.88443	0.278218	0.240906	0.216973	0.01748	0.122379	1.48639	0.6687	1.30165	5.70692
TRIAE_CS42_4BS_TGACv1_328221_AA1084870.2	TaZIFL3_4B	0	0	1.59095e-09	0	0	0	0		2.32882e-09	2.42502e-09	0		5.84065e-10	0	2.10826e-09	7.7141e-05	0.0337933	5.6598e-07	0.204951	0	0.0397501	0.0357564	0.322989	1.73839	0.05124	0.229211	0.772181
TRIAE_CS42_4AL_TGACv1_288497_AA0950190.1	TaZIFL3_4A	0	0	0	0.0039437	0	0	0		0	0.125819	0		0.009747	0	0	0.619213	6.48424	16.7683	0.00903005	0.022928	0	0.0197993	0.514812	0.460922	0.322586	1.43124	5.59967
TRIAE_CS42_4DL_TGACv1_342906_AA1125130.1	TaZIFL4.1_4D	0	0	0	0	0	0	0		0	0	0		0	0	0	0	0.0082636	0.0311705	0.0438902	26.1688	28.1465	0	0	0	0.0249104	0	0
TRIAE_CS42_4BL_TGACv1_320441_AA1039150.2	TaZIFL4.1_4B	0	0	0	0	0	0	0		0	0	0		0	0	0	0	0.000240789	0.197472	0.408943	36.5251	45.3389	0	0	0	0	0	0
TRIAE_CS42_4BS_TGACv1_327875_AA1077360.1	TaZIFL4.2_4B	0.00880177	0.00262082	0	0.0105789	0	0.0140807	0.006906		0	0.25595	0		0.0310433	0.00582365	0.0632541	0.0156541	0.0337606	0.0309005	0.0576308	0.728439	1.15211	0.0587015	0.0348221	0.0871752	0.0174556	0.0237253	0.0456195
TRIAE_CS42_4DS_TGACv1_362084_AA1176610.1	TaZIFL4.2_4D	0	0	0.00572417	0.0039397	0	0	0		0	0	0		0.0078762	0	0	0.00960075	0.0230522	0	0.746793	65.4434	89.9497	0.0481127	0.0764368	0.0158355	0.0825481	0	0
TRIAE_CS42_4AL_TGACv1_291366_AA0994260.1	TaZIFL4.2_4A	0.00663615	0.0190545	0.0495383	0.0195298	0.0072567	0.0128107	0.0170204		0	0	0		0.013799	0.0063899	0.052478	0.0691288	0.0326226	0	0.181393	31.2917	48.0175	0.119435	0.0997125	0.0591252	0.0600099	0.0218505	0.0413712
TRIAE_CS42_5DL_TGACv1_433110_AA1402350.2	TaZIFL5_5D	0.0823923	0.10492	0.179893	0.0830019	0.0124775	0.112407	0.366841		0.095836	0	0		0.0168444	0.103207	0.236439	0.0348014	0.0712785	0.199632	0.0879995	0.521773	0.393746	0	0.113516	0.0876154	0.0525256	0	0.0189012
TRIAE_CS42_5BL_TGACv1_404850_AA1312820.1	TaZIFL5_5B	2.05775	2.75954	1.69836	5.72322	1.1133	2.38687	6.37769		1.05733	0.259532	1.48161		0.0654626	1.91979	6.32561	0.232484	2.80379	1.52526	0.51291	2.72811	3.6143	0.0223269	0.110756	0.0561876	0.185782	0.263849	0.134335
TRIAE_CS42_5AL_TGACv1_375996_AA1230350.1	TaZIFL5_5A	2.40015	9.92553	5.91383	21.3663	1.65347	7.41896	18.0929		2.98872	0.773165	1.07752		1.21097	3.93165	43.163	0.958184	7.68222	4.30076	6.67314	25.7169	27.1883	1.68292	3.81445	3.07299	9.66114	5.62327	3.25731
TRIAE_CS42_5DL_TGACv1_433110_AA1402340.1	TaZIFL6.1_5D	0.403639	0.26741	0.0923037	0.250197	0.367736	0.0984912	0.318423		0.245916	0.13062	0.508235		0.057666	0.131749	0	0.0540515	0.439607	0	2.06238	1.68817	1.42564	2.3499	2.51189	0.0186784	1.46522	0.26178	0.0424056
TRIAE_CS42_5AL_TGACv1_375996_AA1230380.1	TaZIFL6.1_5A	0.120267	0.00562023	0.0050695	0.00738393	0.0232157	0	0.005803		0	0	0		0.0345277	0.0115346	0	0.0246622	0.0884651	0	1.0217	1.43938	1.01741	0.771736	0.406777	0.0304643	0.689586	0.172948	0.0170185
TRIAE_CS42_4AL_TGACv1_288715_AA0956250.1	TaZIFL6.2_4A	0.0449855	0.00566852	0	0	0.00751922	0	0.00673115		0	0	0.052565		0	0.0064331	0	0	0	0	0.150123	7.99655	7.44942	0.00987275	0	0	0	0	0
TRIAE_CS42_4DS_TGACv1_361827_AA1173320.1	TaZIFL6.2_4D	0.0974375	0.021316	0.00552473	0.0305036	0.0374992	0	0.0405088		0.085952	0	0.077353		0	0.0365629	0	0	0.0083492	0	0.482058	13.7904	11.4614	0	0	0	0	0	0
TRIAE_CS42_4BS_TGACv1_329309_AA1100040.1	TaZIFL6.2_4B	0.0851703	0.017881	0.0177409	0.00742228	0.0268344	0	0.0064625		0	0	0.39506		0	0	0	0	0	0	0.061868	6.28955	6.51092	0	0	0	0	0	0
TRIAE_CS42_4AL_TGACv1_291366_AA0994250.2	TaZIFL7.1_4A	0.4389	0.248278	0.36453	0.0691336	0.058416	0.520389	0.311587		0.560323	3.52225	0.260708		3.65789	0.137517	5.20409	0.684279	2.164	3.22518	0.814216	0.745111	1.04484	0.599811	0.941169	4.38234	0.73985	0.306376	0.461865
TRIAE_CS42_4DS_TGACv1_361603_AA1170580.1	TaZIFL7.1_4D	0.85691	0.247795	0.217931	0.190302	0.298739	0.351689	0.592626		1.00859	5.61976	0.546198		12.0001	0.441248	27.4089	1.68795	5.88369	22.0502	9.81968	6.94803	8.9423	7.08267	6.52996	11.3458	5.3623	9.3614	5.31968
TRIAE_CS42_4BS_TGACv1_328561_AA1090060.3	TaZIFL7.1_4B	0	0	0.0208881	0	0	0	0		0	0	0		0.151107	0	0.35917	0	0	0.038574	0	0	0	0.162616	0.0747955	0.172148	0.0321494	0	0
TRIAE_CS42_4DS_TGACv1_361556_AA1170070.1	TaZIFL7.2_4D	0	0.0150015	0	0	0.00582087	0.0046671	0.021599		0	0	0		0.0370598	0	0	0.0947691	0.356314	0.0607522	5.06001	6.60419	8.05142	0.0321519	0.0685204	0.00885055	0.410605	0.896824	0.24718
TRIAE_CS42_4AL_TGACv1_290490_AA0986000.1	TaZIFL7.2_4A	0	0	0	0	0	0	0		0	0	0		0	0	0	0.105624	0	0	0.206284	0.561298	0.962763	0.0900977	0	0	0	0.106659	0.192867
TRIAE_CS42_4BS_TGACv1_328176_AA1084060.1	TaZIFL7.2_4B	0.0140856	0.107925	0.0598717	0.0101641	0.14013	0.143933	0.0382805		0	1.30591	0.161622		0.0497143	0.0089876	0.0144174	0.0103993	0.0101142	0	0.725097	1.60163	1.62484	0.0260984	0.0399325	0	0.0929579	0.0410957	0.0932524

## Sheet: Experiment details
Experiment name	Detail
TISSUES, STAGES
GTDT we_repr_10dpa CS	grain tissue-specific developmental timecourse, grain, whole endosperm, reproductive, 10 dpa, no stress, none, Chinese Spring, Chinese Spring(n=4)
GTDT we_repr_20dpa CS	grain tissue-specific developmental timecourse, grain, whole endosperm, reproductive, 20 dpa, no stress, none, Chinese Spring, Chinese Spring(n=4)
GTDT tc_repr_20dpa CS	grain tissue-specific developmental timecourse, grain, transfer cells, reproductive, 20 dpa, no stress, none, Chinese Spring, Chinese Spring(n=4)
GTDT al_repr_20dpa CS	grain tissue-specific developmental timecourse, grain, aleurone layer, reproductive, 20 dpa, no stress, none, Chinese Spring, Chinese Spring(n=6)
GTDT se_repr_20dpa CS	grain tissue-specific developmental timecourse, grain, starchy endosperm, reproductive, 20 dpa, no stress, none, Chinese Spring, Chinese Spring(n=4)
GTDT al/se_repr_30dpa CS	grain tissue-specific developmental timecourse, grain, aleurone layer and starchy endosperm, reproductive, 30 dpa, no stress, none, Chinese Spring, Chinese Spring(n=4)
GTDT se_repr_30dpa CS	grain tissue-specific developmental timecourse, grain, starchy endosperm, reproductive, 30 dpa, no stress, none, Chinese Spring, Chinese Spring(n=4)
GTE al_12dpa_repr Hf	grain tissue-specific expression at 12 days post anthesis, grain, aleurone layer, reproductive, 12 dpa, no stress, none, other, Holdfast(n=3)
GTE sc_12dpa_repr Hf	grain tissue-specific expression at 12 days post anthesis, grain, seed coat, reproductive, 12 dpa, no stress, none, other, Holdfast(n=3)
GTE se_12dpa_repr Hf	grain tissue-specific expression at 12 days post anthesis, grain, starchy endosperm, reproductive, 12 dpa, no stress, none, other, Holdfast(n=3)
DTCS gr_repr_2dpa CS	developmental time-course of Chinese Spring, grain, grain, reproductive, 2 dpa, no stress, none, Chinese Spring, Chinese Spring(n=2)
DTCS gr_repr_14dpa CS	developmental time-course of Chinese Spring, grain, grain, reproductive, 14 dpa, no stress, none, Chinese Spring, Chinese Spring(n=2)
DTCS gr_repr_30dpa CS	developmental time-course of Chinese Spring, grain, grain, reproductive, 30 dpa, no stress, none, Chinese Spring, Chinese Spring(n=2)
DTCS lf_sd_ss CS	developmental time-course of Chinese Spring, leaves/shoots, leaves, seedling, seedling stage, no stress, none, Chinese Spring, Chinese Spring(n=2)
DTCS lf_vege_ts CS	developmental time-course of Chinese Spring, leaves/shoots, leaves, vegetative, tillering stage, no stress, none, Chinese Spring, Chinese Spring(n=2)
DTCS lf_ rep_ 2dpa CS	developmental time-course of Chinese Spring, leaves/shoots, leaves, reproductive, 2 dpa, no stress, none, Chinese Spring, Chinese Spring(n=2)
DTCS rt_ seed_ ss CS	developmental time-course of Chinese Spring, roots, roots, seedling, seedling stage, no stress, none, Chinese Spring, Chinese Spring(n=2)
DTCS rt_ vege_ 3ls CS	developmental time-course of Chinese Spring, roots, roots, vegetative, three leaf stage, no stress, none, Chinese Spring, Chinese Spring(n=2)
DTCS rt_ rep_ fls CS	developmental time-course of Chinese Spring, roots, roots, reproductive, flag leaf stage, no stress, none, Chinese Spring, Chinese Spring(n=2)
DTCS sp_ vege_ 2nd CS	developmental time-course of Chinese Spring, spike, spike, vegetative, two nodes detectable, no stress, none, Chinese Spring, Chinese Spring(n=2)
DTCS sp_ rep_ fls CS	developmental time-course of Chinese Spring, spike, spike, reproductive, flag leaf stage, no stress, none, Chinese Spring, Chinese Spring(n=2)
DTCS sp_ rep_ ant CS	developmental time-course of Chinese Spring, spike, spike, reproductive, anthesis, no stress, none, Chinese Spring, Chinese Spring(n=2)
DTCS st_ vege_ 1cs CS	developmental time-course of Chinese Spring, leaves/shoots, stem, vegetative, 1 cm spike, no stress, none, Chinese Spring, Chinese Spring(n=2)
DTCS st_ vege_ 2nd CS	developmental time-course of Chinese Spring, leaves/shoots, stem, vegetative, two nodes detectable, no stress, none, Chinese Spring, Chinese Spring(n=2)
DTCS st_ rep_ ant CS	developmental time-course of Chinese Spring, leaves/shoots, stem, reproductive, anthesis, no stress, none, Chinese Spring, Chinese Spring(n=2)
ABIOTIC STRESS
Ps root_24d_None CS	roots, vegetative, 24 days, no stress, none, Chinese Spring, Chinese Spring(n=3)
Ps root_24d_Ps10d	roots, vegetative, 24 days, abiotic, Phosphorous starvation 10 days, Chinese Spring, Chinese Spring(n=3)
Ps shoot_24d_None CS	leaves/shoots, vegetative, 24 days, no stress, none, Chinese Spring, Chinese Spring(n=3)
Ps shoot_24d_Ps10d	leaves/shoots, vegetative, 24 days, abiotic, Phosphorous starvation 10 days, Chinese Spring, Chinese Spring(n=3)
DHST leaf_none TA	leaves/shoots, seedling, 7 days, no stress, none, other, TAM107(n=2)
DHST leaf_1h_ds	leaves/shoots, seedling, 7 days, abiotic, 1 hour of drought stress, other, TAM107(n=2)
DHST leaf_6h_ds	leaves/shoots, seedling, 7 days, abiotic, 6 hour of drought stress, other, TAM107(n=2)
DHST leaf_1h_hs	leaves/shoots, seedling, 7 days, abiotic, 1 hour of heat stress, other, TAM107(n=2)
DHST leaf_6h_hs	leaves/shoots, seedling, 7 days, abiotic, 6 hour of heat stress, other, TAM107(n=2)
DHST leaf_1h_d&hcs	leaves/shoots, seedling, 7 days, abiotic, 1 hour of drought&heat combined stress, other, TAM107(n=2)
DHST leaf_6h_d&hcs	leaves/shoots, seedling, 7 days, abiotic, 6 hour of drought&heat combined stress, other, TAM107(n=2)
BIOTIC STRESS
FHB sp_30h_mi	spike, reproductive, anthesis, no stress, mock inoculation 30 hours, other, CM-82036(n=3)
FHB_sp_30h_fgi CM	spike, reproductive, anthesis, disease, Fusarium graminearum inoculation 30 hours, other, CM-82036(n=3)
FHB sp_50h_mi	spike, reproductive, anthesis, no stress, mock inoculation 50 hours, other, CM-82036(n=3)
FHB_sp_50h_fgi CM	spike, reproductive, anthesis, disease, Fusarium graminearum inoculation 50 hours, other, CM-82036(n=3)
FHB sp_30h_mi	spike, reproductive, anthesis, no stress, mock inoculation 30 hours, other, NIL1 from CM-82036 BC5 in Remus(n=3)
FHB_sp_30h_fgi CMN1	spike, reproductive, anthesis, disease, Fusarium graminearum inoculation 30 hours, other, NIL1 from CM-82036 BC5 in Remus(n=3)
FHB sp_50h_mi	spike, reproductive, anthesis, no stress, mock inoculation 50 hours, other, NIL1 from CM-82036 BC5 in Remus(n=4)
FHB_sp_50h_fgi CMN1	spike, reproductive, anthesis, disease, Fusarium graminearum inoculation 50 hours, other, NIL1 from CM-82036 BC5 in Remus(n=2)
FHB sp_30h_mi	spike, reproductive, anthesis, no stress, mock inoculation 30 hours, other, NIL2 from CM-82036 BC5 in Remus(n=4)
FHB_sp_30h_fgi CMN2	spike, reproductive, anthesis, disease, Fusarium graminearum inoculation 30 hours, other, NIL2 from CM-82036 BC5 in Remus(n=2)
FHB sp_50h_mi	spike, reproductive, anthesis, no stress, mock inoculation 50 hours, other, NIL2 from CM-82036 BC5 in Remus(n=3)
FHB_sp_50h_fgi CMN2	spike, reproductive, anthesis, disease, Fusarium graminearum inoculation 50 hours, other, NIL2 from CM-82036 BC5 in Remus(n=3)
FHB sp_30h_mi	spike, reproductive, anthesis, no stress, mock inoculation 30 hours, other, NIL3 from CM-82036 BC5 in Remus(n=2)
FHB_sp_30h_fgi CMN3	spike, reproductive, anthesis, disease, Fusarium graminearum inoculation 30 hours, other, NIL3 from CM-82036 BC5 in Remus(n=4)
FHB sp_50h_mi	spike, reproductive, anthesis, no stress, mock inoculation 50 hours, other, NIL3 from CM-82036 BC5 in Remus(n=2)
FHB_sp_50h_fgi CMN3	spike, reproductive, anthesis, disease, Fusarium graminearum inoculation 50 hours, other, NIL3 from CM-82036 BC5 in Remus(n=4)
FHB sp_30h_mi	spike, reproductive, anthesis, no stress, mock inoculation 30 hours, other, NIL4 from CM-82036 BC5 in Remus(n=3)
FHB_sp_30h_fgi CMN4	spike, reproductive, anthesis, disease, Fusarium graminearum inoculation 30 hours, other, NIL4 from CM-82036 BC5 in Remus(n=3)
FHB sp_50h_mi	spike, reproductive, anthesis, no stress, mock inoculation 50 hours, other, NIL4 from CM-82036 BC5 in Remus(n=3)
FHB_sp_50h_fgi CMN4	spike, reproductive, anthesis, disease, Fusarium graminearum inoculation 50 hours, other, NIL4 from CM-82036 BC5 in Remus(n=3)
2ndlf_none S	leaves/shoots, seedling, 14 days, no stress, none, other, Sevin(n=4)
STIS 2ndlf_4d_st	leaves/shoots, seedling, 14 days, disease, Septoria tritici 4 days, other, Sevin(n=2)
STIS 2ndlf_10d_st	leaves/shoots, seedling, 14 days, disease, Septoria tritici 10 days, other, Sevin(n=1)
STIS 2ndlf_13d_st	leaves/shoots, seedling, 14 days, disease, Septoria tritici 13 days, other, Sevin(n=1)
SRPM lf_srp24h	leaves/shoots, seedling, 7 days, disease, stripe rust pathogen CYR31 24 hours, other, N9134(n=3)
SRPM lf_srp48h	leaves/shoots, seedling, 7 days, disease, stripe rust pathogen CYR31 48 hours, other, N9134(n=3)
SRPM lf_srp72h	leaves/shoots, seedling, 7 days, disease, stripe rust pathogen CYR31 72 hours, other, N9134(n=3)
lf_none N9	leaves/shoots, seedling, 7 days, no stress, none, other, N9134(n=3)
SRPM lf_pmp24h	leaves/shoots, seedling, 7 days, disease, Powdery mildew pathogen E09 24 hours, other, N9134(n=3)
SRPM lf_pmp48h	leaves/shoots, seedling, 7 days, disease, Powdery mildew pathogen E09 48 hours, other, N9134(n=3)
SRPM lf_pmp72h	leaves/shoots, seedling, 7 days, disease, Powdery mildew pathogen E09 72 hours, other, N9134(n=3)
